# Supplementary material
Source: HighWire-hosted journal article supplement (http://www.cmaj.ca/highwire/filestream/58920/field_highwire_adjunct_files/0/cognitive-straus-1-at.pdf)
Supplement: cognitive-straus-1-at.pdf [file cognitive-straus-1-at.pdf]

## Appendix 1 (as supplied by the authors): Patient characteristics

| Reference                     | Sex, % female | Age, yr, mean (SD) [range] | Diagnostic criteria for MCI [qualifying score]                                                                         | Comorbidities                                    |
|-------------------------------|---------------|----------------------------|------------------------------------------------------------------------------------------------------------------------|--------------------------------------------------|
| Winblad et al. <sup>27</sup>  | 54            | 69.65 (9.1)                | CDR [0.5]<br>Gradual onset and slow progression of cognitive disabilities<br>NYU Delayed Paragraph Recall Test [≤10]   | Hypertension                                     |
| Winblad et al. <sup>27</sup>  | 57            | 70.75 (8.68)               | CDR [0.5]<br>Gradual onset and slow progression of cognitive disabilities<br>NYU Delayed Paragraph Recall Test [≤10]   | Hypertension                                     |
| Ozenli et al. <sup>28</sup>   | 55            | 66.05(3.35)<br>[61–72]     | DSM-IV<br>MMSE [≥24 and ≤26]                                                                                           | Diabetes mellitus, type 2 diabetes, hypertension |
| Salloway et al. <sup>29</sup> | 42            | 72.4 (8) [55–90]           | ADL [≥1.5 on 3 functional domains: home and hobbies, community affairs, personal care]<br>CDR [0.5 or 1]<br>MMSE [≥24] | NR                                               |
| Petersen et al. <sup>30</sup> | 46            | 72.9 (7.3)                 | CDR [0.5]<br>MMSE [24–30]<br>WMS: logical memory delayed recall [1.5 to 2 SD below an education-adjusted norm]         | NR                                               |
| Doody et al. <sup>31</sup>    | 45            | 70 (10) [45–90]            | CDR [0.5]<br>MMSE [24–28]<br>WMS: logical memory II delayed paragraph recall subtest [≤8]                              | NR                                               |
| Feldman et al. <sup>32</sup>  | 52            | 70.45 (7.5)                | CDR [0.5]<br>NYU Delayed Paragraph Recall Test [≤9]                                                                    | Hypercholesterolemia, hypertension, insomnia     |
| Ferris et al. <sup>33</sup>   | 65            | 66.7 (8.6)<br>[50–79]      | GDS [≤11]<br>MMSE [≥26]<br>WMS-R [at least 1 SD below the mean]                                                        | NR                                               |

Note: ADL = activities of daily living; CDR = Clinical Dementia Rating; DSM-III-R = *Diagnostic and Statistical Manual of Mental Disorders*, third edition, revised; DSM-IV = *Diagnostic and Statistical Manual of Mental Disorders*, fourth edition; GDS = Global Deterioration Scale; MCI = mild cognitive impairment; MMSE = Mini-Mental State Examination; NR = not reported; NYU = New York University; SD = standard deviation; WMS = Wechsler Memory Scale; WMS-R = Wechsler Memory Scale Revised.
